# Supplementary material for: Environmental Screening of Fonsecaea Agents of Chromoblastomycosis Using Rolling Circle Amplification
Source: PubMed Central journal article supplement (PMC7712894; doi:10.3390/jof6040290), 2020-11-17
Supplement: jof-06-00290-s001.pdf [file jof-06-00290-s001.pdf]

## 1 SUPPLEMENTARY TABLE

2 Environmental samples from Maranhão state, Brazil, analyzed by RCA padlock probes.

| Sample | Padlock Probe |     | Source                              | Geography                                         |
|--------|---------------|-----|-------------------------------------|---------------------------------------------------|
|        | FOP           | FOM |                                     |                                                   |
| 1      | +             | +   | Decomposing material                | Bacabeira, Maranhão State, Brazil                 |
| 2      | +             | +   | Decomposing material                | Bacabeira, Maranhão State, Brazil                 |
| 3      | -             | -   | Decomposing material                | Bacabeira, Maranhão State, Brazil                 |
| 4      | -             | +   | Decomposing material                | Bacabeira, Maranhão State, Brazil                 |
| 5      | -             | -   | Decomposing material                | Bacabeira, Maranhão State, Brazil                 |
| 6      | -             | +   | Leaf of <i>A. vulgare</i>           | Bacabeira, Maranhão State, Brazil                 |
| 7      | +             | +   | Leaf of <i>S.paniculatum</i>        | Bacabeira, Maranhão State, Brazil                 |
| 8      | -             | +   | Leaf of <i>S. dulcis</i>            | Bacabeira, Maranhão State, Brazil                 |
| 9      | -             | +   | Leaf of <i>M.paniculata</i>         | Bacabeira, Maranhão State, Brazil                 |
| 10     | +             | -   | Leaf of <i>P. insignis</i>          | Bacabeira, Maranhão State, Brazil                 |
| 11     | -             | -   | Plant spine of <i>A.vulgare</i>     | Bacabeira, Maranhão State, Brazil                 |
| 12     | -             | -   | Plant spine of <i>S.paniculatum</i> | Bacabeira, Maranhão State, Brazil                 |
| 13     | -             | -   | Plant spine <i>S. paniculatum</i>   | Bacabeira, Maranhão State, Brazil                 |
| 14     | -             | -   | Plant spine of <i>A. vulgare</i>    | Bacabeira, Maranhão State, Brazil                 |
| 15     | -             | -   | Plant spine of <i>A. vulgare</i>    | Bacabeira, Maranhão State, Brazil                 |
| 16     | -             | -   | Steam of, <i>A. vulgare</i>         | Bacabeira, Maranhão State, Brazil                 |
| 17     | -             | +   | Steam of, <i>S.paniculatum</i>      | Bacabeira, Maranhão State, Brazil                 |
| 18     | -             | +   | Steam of <i>S. dulcis</i>           | Bacabeira, Maranhão State, Brazil                 |
| 19     | -             | +   | Steam of <i>M. paniculata</i>       | Bacabeira, Maranhão State, Brazil                 |
| 20     | -             | -   | Steam of <i>P. insignis</i>         | Bacabeira, Maranhão State, Brazil                 |
| 21     | -             | -   | Decomposing Material                | São Benedito do Rio Preto, Maranhão State, Brazil |
| 22     | -             | -   | Decomposing Material                | São Benedito do Rio Preto, Maranhão State, Brazil |
| 23     | -             | -   | Decomposing Material                | São Benedito do Rio Preto, Maranhão State, Brazil |
| 24     | -             | -   | Decomposing Material                | São Benedito do Rio Preto, Maranhão State, Brazil |
| 25     | -             | +   | Decomposing Material                | São Benedito do Rio Preto, Maranhão State, Brazil |
| 26     | -             | -   | Leaf of <i>S.dulcis</i>             | São Benedito do Rio Preto, Maranhão State, Brazil |
| 27     | -             | -   | Leaf of <i>M.paniculata</i>         | São Benedito do Rio Preto, Maranhão State, Brazil |
| 28     | -             | -   | Leaf of <i>A. vulgare</i>           | São Benedito do Rio Preto, Maranhão State, Brazil |
| 29     | -             | +   | Leaf of <i>A. vulgare</i>           | São Benedito do Rio Preto, Maranhão State, Brazil |
| 30     | -             | +   | Leaf of <i>A.vulgare</i>            | São Benedito do Rio Preto, Maranhão State, Brazil |
| 31     | -             | -   | Plant spine of <i>A. vulgare</i>    | São Benedito do Rio Preto, Maranhão State, Brazil |
| 32     | -             | -   | Plant spine of, <i>A. vulgare</i>   | São Benedito do Rio Preto, Maranhão State, Brazil |
| 33     | -             | +   | Steam of, <i>S. dulcis</i>          | São Benedito do Rio Preto, Maranhão State, Brazil |
| 34     | -             | +   | Steam of <i>M. paniculata</i>       | São Benedito do Rio Preto, Maranhão State, Brazil |
| 35     | -             | +   | Steam of <i>A.vulgare</i>           | São Benedito do Rio Preto, Maranhão State, Brazil |
| 36     | -             | +   | Steam of <i>A. vulgare</i>          | São Benedito do Rio Preto, Maranhão State, Brazil |
| 37     | -             | +   | Steam of <i>A. vulgare</i>          | São Benedito do Rio Preto, Maranhão State, Brazil |
| 38     | -             | -   | Steam of <i>A.vulgare</i>           | Nina Rodrigues, Maranhão State, Brazil            |
| 39     | -             | -   | Steam of <i>S. dulcis</i>           | Nina Rodrigues, Maranhão State, Brazil            |
| 40     | -             | -   | Steam of <i>S. dulcis</i>           | Nina Rodrigues, Maranhão State, Brazil            |
| 41     | -             | -   | Steam of <i>S. dulcis</i>           | Nina Rodrigues, Maranhão State, Brazil            |
| 42     | -             | -   | Steam of <i>S. dulcis</i>           | Nina Rodrigues, Maranhão State, Brazil            |
| 43     | -             | -   | Leaf of <i>A. vulgare</i>           | Nina Rodrigues, Maranhão State, Brazil            |
| 44     | -             | -   | Leaf of <i>S. dulcis</i>            | Nina Rodrigues, Maranhão State, Brazil            |
| 45     | -             | -   | Leaf of <i>S. dulcis</i>            | Nina Rodrigues, Maranhão State, Brazil            |
| 46     | -             | -   | Leaf of <i>S. dulcis</i>            | Nina Rodrigues, Maranhão State, Brazil            |
| 47     | -             | +   | Leaf of <i>S. dulcis</i>            | Nina Rodrigues, Maranhão State, Brazil            |
| 48     | -             | +   | Steam of <i>A. vulgare</i>          | Pinheiro, Maranhão State, Brazil                  |
| 49     | -             | -   | Steam of <i>Urtica</i> spp.         | Pinheiro, Maranhão State, Brazil                  |
| 50     | -             | -   | Steam of <i>M. paniculata</i>       | Pinheiro, Maranhão State, Brazil                  |
| 51     | -             | +   | Steam of <i>S. dulcis</i>           | Pinheiro, Maranhão State, Brazil                  |
| 52     | -             | -   | Steam of <i>M. indica</i>           | Pinheiro, Maranhão State, Brazil                  |

|     |   |   |                                      |                                                   |
|-----|---|---|--------------------------------------|---------------------------------------------------|
| 53  | - | - | Decomposing material                 | Nina Rodrigues, Maranhão State, Brazil            |
| 54  | - | - | Decomposing material                 | Nina Rodrigues, Maranhão State, Brazil            |
| 55  | - | - | Decomposing material                 | Nina Rodrigues, Maranhão State, Brazil            |
| 56  | - | - | Decomposing material                 | Nina Rodrigues, Maranhão State, Brazil            |
| 57  | - | + | Decomposing material                 | Nina Rodrigues, Maranhão State, Brazil            |
| 58  | - | - | Decomposing material                 | Pinheiro, Maranhão State, Brazil                  |
| 59  | - | + | Decomposing material                 | Pinheiro, Maranhão State, Brazil                  |
| 60  | - | - | Decomposing material                 | Pinheiro, Maranhão State, Brazil                  |
| 61  | - | - | Decomposing material                 | Pinheiro, Maranhão State, Brazil                  |
| 62  | - | + | Decomposing material                 | Pinheiro, Maranhão State, Brazil                  |
| 63  | - | + | Leaf of <i>A. vulgare</i>            | Pinheiro, Maranhão State, Brazil                  |
| 64  | - | - | Leaf of <i>Urtica</i> spp.           | Pinheiro, Maranhão State, Brazil                  |
| 65  | - | - | Leaf of <i>M. paniculata</i>         | Pinheiro, Maranhão State, Brazil                  |
| 66  | - | - | Leaf of <i>S. dulcis</i>             | Pinheiro, Maranhão State, Brazil                  |
| 67  | - | - | Leaf of <i>M. indica</i>             | Pinheiro, Maranhão State, Brazil                  |
| 68  | - | - | Soil                                 | Bacabeira, Maranhão State, Brazil                 |
| 69  | - | - | Soil                                 | Bacabeira, Maranhão State, Brazil                 |
| 70  | - | - | Soil                                 | Bacabeira, Maranhão State, Brazil                 |
| 71  | - | + | Soil                                 | Bacabeira, Maranhão State, Brazil                 |
| 72  | - | + | Soil                                 | Bacabeira, Maranhão State, Brazil                 |
| 73  | - | - | Soil                                 | São Benedito do Rio Preto, Maranhão State, Brazil |
| 74  | - | - | Soil                                 | São Benedito do Rio Preto, Maranhão State, Brazil |
| 75  | - | + | Soil                                 | São Benedito do Rio Preto, Maranhão State, Brazil |
| 76  | - | - | Soil                                 | São Benedito do Rio Preto, Maranhão State, Brazil |
| 77  | - | + | Soil                                 | São Benedito do Rio Preto, Maranhão State, Brazil |
| 78  | + | - | Soil                                 | Pinheiro, Maranhão State, Brazil                  |
| 79  | - | - | Soil                                 | Pinheiro, Maranhão State, Brazil                  |
| 80  | - | - | Soil                                 | Pinheiro, Maranhão State, Brazil                  |
| 81  | - | - | Soil                                 | Pinheiro, Maranhão State, Brazil                  |
| 82  | - | - | Soil                                 | Pinheiro, Maranhão State, Brazil                  |
| 83  | - | - | Soil                                 | Nina Rodrigues, Maranhão State, Brazil            |
| 84  | - | - | Soil                                 | Nina Rodrigues, Maranhão State, Brazil            |
| 85  | - | - | Soil                                 | Nina Rodrigues, Maranhão State, Brazil            |
| 86  | - | - | Soil                                 | Nina Rodrigues, Maranhão State, Brazil            |
| 87  | - | - | Soil                                 | Nina Rodrigues, Maranhão State, Brazil            |
| 88  | + | + | Babassu coconut, <i>O. phalerata</i> | Maranhão State, Brazil [2]                        |
| 89  | - | + | Babassu coconut, <i>O. phalerata</i> | Maranhão State, Brazil [2]                        |
| 90  | - | + | Babassu coconut, <i>O. phalerata</i> | Maranhão State, Brazil [2]                        |
| 91  | - | + | Babassu coconut, <i>O. phalerata</i> | Maranhão State, Brazil [2]                        |
| 92  | - | + | Babassu coconut, <i>O. phalerata</i> | Maranhão State, Brazil [2]                        |
| 93  | - | + | Babassu coconut, <i>O. phalerata</i> | Maranhão State, Brazil [2]                        |
| 94  | - | + | Babassu coconut, <i>O. phalerata</i> | Maranhão State, Brazil [2]                        |
| 95  | - | + | Babassu coconut, <i>O. phalerata</i> | Maranhão State, Brazil [2]                        |
| 96  | - | + | Babassu coconut, <i>O. phalerata</i> | Maranhão State, Brazil [2]                        |
| 97  | - | + | Babassu coconut, <i>O. phalerata</i> | Maranhão State, Brazil [2]                        |
| 98  | - | + | Babassu coconut, <i>O. phalerata</i> | Maranhão State, Brazil [2]                        |
| 99  | - | + | Babassu coconut, <i>O. phalerata</i> | Maranhão State, Brazil [2]                        |
| 100 | - | - | Babassu coconut, <i>O. phalerata</i> | Maranhão State, Brazil [2]                        |
| 101 | - | - | Babassu coconut, <i>O. phalerata</i> | Maranhão State, Brazil [2]                        |
| 102 | - | - | Babassu coconut, <i>O. phalerata</i> | Maranhão State, Brazil [2]                        |
| 103 | - | - | Babassu coconut, <i>O. phalerata</i> | Maranhão State, Brazil [2]                        |
| 104 | + | - | Babassu coconut, <i>O. phalerata</i> | Maranhão State, Brazil [2]                        |
| 105 | - | - | Babassu coconut, <i>O. phalerata</i> | Maranhão State, Brazil [2]                        |
| 106 | - | - | Babassu coconut, <i>O. phalerata</i> | Maranhão State, Brazil [2]                        |
| 107 | - | - | Babassu coconut, <i>O. phalerata</i> | Maranhão State, Brazil [2]                        |
